# Supplementary material
Source: publisher figshare collection journal article supplement (https://sage.figshare.com/ndownloader/files/15142070)
Supplement: Supplementary file 1 [file 15142070]

**Supplementary materials 2** Support for the relation between CBT-procedures and learning processes, learning processes and CBT treatment processes, and learning processes and CBT outcome

| Study characteristics and main findings      |                      |                                                |                                                                                                                                                                                                    |                                                                                                |                                                                                                                                                                                                                                                                                                                                                                                                                                                                                                                                                           |                   |
|----------------------------------------------|----------------------|------------------------------------------------|----------------------------------------------------------------------------------------------------------------------------------------------------------------------------------------------------|------------------------------------------------------------------------------------------------|-----------------------------------------------------------------------------------------------------------------------------------------------------------------------------------------------------------------------------------------------------------------------------------------------------------------------------------------------------------------------------------------------------------------------------------------------------------------------------------------------------------------------------------------------------------|-------------------|
|                                              | Study                | Design                                         | Sample (n)                                                                                                                                                                                         | CBT doses                                                                                      | Main findings                                                                                                                                                                                                                                                                                                                                                                                                                                                                                                                                             | Level of evidence |
| <b>CBT-procedures and learning processes</b> |                      |                                                |                                                                                                                                                                                                    |                                                                                                |                                                                                                                                                                                                                                                                                                                                                                                                                                                                                                                                                           |                   |
| <i>Cognitive processes</i>                   | Groves et al., 2015  | RCT                                            | Depressed participants were randomized to 12 weeks of metacognitive therapy (MCT) (n=23) or CBT (n=25)                                                                                             | 8 - 15 45-minute sessions                                                                      | From baseline - week 4 sustained attention and spatial problem solving improved in both groups. From baseline - week 12 errors in spatial problem solving reduced in the MCT group but not the CBT group, while verbal fluency and visual sustained attention improved in both groups. Analyses controlled for baseline depression severity and cognitive performance and there were no significant correlations between change in depression and change in cognitive task performance.                                                                   | II                |
|                                              | Beard et al., 2015   | Prospective cohort study without control group | 32 patients with a mood disorder: major depressive disorder (n=21), bipolar I disorder (n=5), bipolar II disorder (n=2) and mood disorder not otherwise specified (n=4) receiving CBT + medication | Five 50-min group sessions each day and 2-3 weekly individual sessions in an average of 8 days | Post-error, but not post-correct, accuracy on an arrow flanker task improved with treatment. Reaction times were faster after treatment.                                                                                                                                                                                                                                                                                                                                                                                                                  | IV                |
|                                              | Pearson et al., 2013 | RCT                                            | Pregnant women with MDD randomized into CBT (n=12) or usual care (n=12). A non-depressed comparison group (n=51) was included.                                                                     | 9 to 12 individual sessions                                                                    | Depressed women in both arms showed a diminished attentional bias for infant distress compared to a non-depressed comparison group. Following intervention attentional biases of women who received CBT increased becoming comparable to non-depressed women. There was no improvement in the usual care arm. There was a strong negative correlation between change in attentional bias and change in depression, but not in the CBT group (greater reduction in depression is related to greater increase of attentional bias towards infant distress). | II                |

|                                  |                        |                                             |                                                                                                                |                                                                                 |                                                                                                                                                                                                                                                                                                                             |     |
|----------------------------------|------------------------|---------------------------------------------|----------------------------------------------------------------------------------------------------------------|---------------------------------------------------------------------------------|-----------------------------------------------------------------------------------------------------------------------------------------------------------------------------------------------------------------------------------------------------------------------------------------------------------------------------|-----|
| <i>Neurobiological processes</i> | Hummel et al., 2017    | RCT                                         | Depressed elder (age > 65) randomized into CBT (n=56) versus waiting list control group with usual care (n=99) | 15 weekly 90-minute group sessions (first and last session individual)          | Cognitive functioning (measured with Mini-Mental State Examination) improved after CBT compared to the control group. Cognitive functioning at discharge was related to depression.                                                                                                                                         | I   |
|                                  | Spinhoven et al., 2006 | RCT                                         | Participants with MDD in remission allocated to group CT + TAU (n=60) or TAU (n=56)                            | 8 sessions                                                                      | Additional group CT did not differentially affect memory specificity.                                                                                                                                                                                                                                                       | I   |
|                                  | Yoshimura et al., 2017 | Prospective cohort study with control group | 29 patients with MDD and 15 healthy control participants                                                       | 12 weekly, 90 min group CBT sessions; 15 patients also received antidepressants | CBT was associated with reduced functional connectivity between the medial prefrontal cortex (MPFC) and anterior cingulate cortex (ACC). Symptom change with CBT was positively correlated with change in MPFC-ACC functional connectivity.                                                                                 | III |
|                                  | Gawrysiak et al., 2012 | Case study                                  | 1 patient with depression and breast cancer                                                                    | 8 one-hour sessions of BA                                                       | The patient exhibited attenuated depression and changes in blood oxygenation level dependence (BOLD) response in regions of the prefrontal cortex and the subgenual cingulate cortex.                                                                                                                                       | V   |
|                                  | Yokoyama et al., 2017  | RCT                                         | Participants with subthreshold depression randomized to BA (n=19) or no BA (n=21)                              | Five weekly 60-minute sessions                                                  | Functional connectivity of the anterior DMN subnetwork (aDMN) with the dorsal anterior cingulate (dACC) was reduced after BA. Negative correlations between reduction in aDMN-dACC functional connectivity and quality of life and health status but not with change in depression after controlling for depression scores. | II  |
|                                  | Dichter et al., 2009   | Prospective cohort study with control group | Twelve adults with and 15 adults without MDD                                                                   | 11.4 (SD=2.0) weekly sessions BA                                                | Relative to changes in the non-depressed group, BA resulted in functional changes in brain structures that mediate responses to reward. There were no effects on task-related behavioral responses.                                                                                                                         | III |

|                                                       |                                             |                                                                     |                                                                                                               |                                                                                                                                                                                                                                                                                                                                                                                                                                                                                                                            |     |
|-------------------------------------------------------|---------------------------------------------|---------------------------------------------------------------------|---------------------------------------------------------------------------------------------------------------|----------------------------------------------------------------------------------------------------------------------------------------------------------------------------------------------------------------------------------------------------------------------------------------------------------------------------------------------------------------------------------------------------------------------------------------------------------------------------------------------------------------------------|-----|
| Gollan et al., 2014                                   | Prospective cohort study with control group | Depressed (n=37) receiving BA versus healthy participants (n=35)    | 16 weekly sessions                                                                                            | Alpha electroencephalogram (EEG) asymmetry, assumed to be involved in approach- and withdrawal-related motivation did not change from pre- to post treatment while depressive symptoms were reduced at post-treatment.                                                                                                                                                                                                                                                                                                     | III |
| Shou et al., 2017                                     | Prospective cohort study with control group | 35 patients with MDD or PTSD + matched healthy control group (n=18) | 12 sessions of manualized CBT (for MDD) or cognitive processing therapy (CPT; for PTSD) over a 12-week period | The pattern of dysconnectivity between the amygdala connectivity with the frontoparietal network was normalized in response to treatment across MDD and PTSD.                                                                                                                                                                                                                                                                                                                                                              | III |
| Kennedy et al., 2007                                  | RCT                                         | Depressed patients randomized into CBT (n=12) or Venlafaxine (n=12) | 12-16 weekly sessions                                                                                         | CBT response differed from venlafaxine response in that it was associated with less activity in the posterior cingulate and thalamus, increased activity in the left inferior temporal cortex, anterior portion of the subgenual cingulate/ ventromedial frontal cortex and right occipital-temporal cortex. CBT response differed from Venlafaxine nonresponse in that it was associated with decrease of activity in the thalamus, putamen, dorsomedial and dorsolateral prefrontal cortices and the posterior thalamus. | II  |
| Goldapple, Segal, Garson, & Lau, 2004                 | Prospective cohort study with control group | 17 CBT-treated vs. 13 paroxetine-treated patients                   | 15-20 sessions                                                                                                | CBT response was associated with increases in activity in the hippocampus and dorsal cingulate and activity decrease in dorsal, ventral, and medial frontal cortex while increase in the prefrontal areas and decrease in the hippocampal and subgenual cingulate areas were seen in the paroxetine-treated patients. Covarying for depression scores nullified the effects.                                                                                                                                               | III |
| Ritchey, Dolcos, Eddington, Strauman, & Cabezza, 2011 | Prospective cohort study with control group | 11 depressed patients vs. 14 controls                               | Twenty 50-minute sessions                                                                                     | CBT response was associated with increases in ventromedial prefrontal cortex activation, enhanced arousal responses in the amygdala, caudate, hippocampus, and positive valence-related activity in the anterior temporal lobe.                                                                                                                                                                                                                                                                                            | III |

|                   |                                             |                                                                                                                                                             |             |                                                                                                                                                                                                                                                                                                                                                                                                                                                                                                                                                                                                                                                                                                 |     |
|-------------------|---------------------------------------------|-------------------------------------------------------------------------------------------------------------------------------------------------------------|-------------|-------------------------------------------------------------------------------------------------------------------------------------------------------------------------------------------------------------------------------------------------------------------------------------------------------------------------------------------------------------------------------------------------------------------------------------------------------------------------------------------------------------------------------------------------------------------------------------------------------------------------------------------------------------------------------------------------|-----|
| Fu et al., 2008   | Prospective cohort study with control group | 16 depressed patients vs. 16 matched healthy volunteers                                                                                                     | 16 sessions | Normalization of amygdala-hippocampal activity following CBT. In addition, patients showed an increase in activity in the area of the dorsal anterior cingulate extending to the parietal cortex, the superior frontal gyrus, inferior parietal cortex, and precuneus to a level comparable with the load-response in the healthy controls at baseline. Load-response activity in the fusiform and lingual gyri, left lateral temporal and inferior parietal cortices, posterior cingulate cortex, precuneus, and cerebellum was greater at baseline compared to healthy controls but decreased following CBT to a level comparable with the load-response in the healthy controls at baseline. | III |
| Yang et al., 2018 | Prospective cohort study with control group | 28 patients with MDD, 53 patients with PTSD and 23 healthy control subjects: in this group 17 patient with MDD and 34 patients with PTSD volunteered in CBT | 12 sessions | Following CBT, regions within the cognitive control network, including ventrolateral and dorsolateral prefrontal cortex showed a significant increase in activity. No significant correlations were found between these changes in brain activation and changes in depressive symptoms. Healthy controls did not show changed in brain activity.                                                                                                                                                                                                                                                                                                                                                | III |

#### Learning processes and CBT treatment processes

|                            |                           |              |                                                                                  |                                              |                                                                                                                                                                                                                                                                                                                                                                                            |     |
|----------------------------|---------------------------|--------------|----------------------------------------------------------------------------------|----------------------------------------------|--------------------------------------------------------------------------------------------------------------------------------------------------------------------------------------------------------------------------------------------------------------------------------------------------------------------------------------------------------------------------------------------|-----|
| <i>Cognitive processes</i> | Sheppard & Teasdale, 2004 | Case-control | 20 depressed patients, 20 partially remitted depressed patients, and 20 controls | No history of CBT in any participants        | Partially remitted patients resembled nondepressed controls in metacognitive monitoring but differed significantly from acutely depressed patients. Partially remitted patients resembled currently depressed patients in the extent to which dysfunctional schemas are accessed but differed significantly from nondepressed controls. DAS latency and semantic decision tasks were used. | III |
|                            | Sheppard & Teasdale, 2000 | Case-control | 30 depressed patients and 30 controls                                            | No history of CBT in any of the participants | Depressed patients show less metacognitive monitoring of dysfunctional thinking compared to controls using a DAS latency decision task.                                                                                                                                                                                                                                                    | III |

|                                  |                                        |              |                                                                                         |                                                                   |                                                                                                                                                                                                                                                                                                                                                       |     |
|----------------------------------|----------------------------------------|--------------|-----------------------------------------------------------------------------------------|-------------------------------------------------------------------|-------------------------------------------------------------------------------------------------------------------------------------------------------------------------------------------------------------------------------------------------------------------------------------------------------------------------------------------------------|-----|
|                                  | Wenzlaff & Bates, 1998                 | Experiment   | 45 not depressed, 22 at risk and 23 depressive participants                             | Previous CBT treatment unknown                                    | Cognitive load caused an increase in at-risk participants' production of negative statements on the scrambled sentence test.                                                                                                                                                                                                                          | I   |
|                                  | Gemar, Segal, Sagrati, & Kennedy, 2001 | Case-control | 23 formerly depressed and 27 never depressed individuals                                | Formerly depressed patients previously received CBT or medication | There is no association between measures of dysfunctional thinking and associative processing of negative self-biases as measured with the Implicit Association Test.                                                                                                                                                                                 | III |
|                                  | Romero, Sanchez, & Vazquez, 2014       | Case-control | 30 formerly and 40 never depressed individuals                                          | Previous CBT treatment unknown                                    | Higher negative processing under reduced cognitive control and automatic activation of negative meanings using the scrambled sentence test and lexical decision task did predict the proportion of self-endorsed and recalled negative adjectives in formerly depressed, but not in the controls, after controlling for current levels of depression. | III |
|                                  | Johnco, Wuthrich, & Rapee, 2015        | Case-control | 47 older adults with anxiety and depression involved in CBT and 53 nonclinical controls | Unknown                                                           | Cognitive flexibility (CF) partially mediated the relationship between clinical status and cognitive restructuring (CR) efficacy and between clinical status and CR quality.                                                                                                                                                                          | III |
| <i>Neurobiological processes</i> | DeIDonno et al., 2017                  | Case-control | Forty-two individuals with rMDD and 28 healthy controls                                 | Previous CBT treatment unknown                                    | Across groups, ventral striatum (VS), a region highly implicated in reward and motivation, connectivity was related to self-report measures of behavioral activation.                                                                                                                                                                                 | III |

|                                                   |              |                                                                                                                        |                                |                                                                                                                                                                                                                                                                                                                                                                                                                                                                                           |     |
|---------------------------------------------------|--------------|------------------------------------------------------------------------------------------------------------------------|--------------------------------|-------------------------------------------------------------------------------------------------------------------------------------------------------------------------------------------------------------------------------------------------------------------------------------------------------------------------------------------------------------------------------------------------------------------------------------------------------------------------------------------|-----|
| Gollan et al., 2014                               | Case-control | Depressed (n = 37) receiving BA versus healthy participants (n = 35)                                                   | 16 weekly sessions             | At pre-treatment alpha electroencephalogram asymmetry showed a positive correlation with behavioral inhibition and negative affect and an inverse correlation with behavioral activation fun-seeking. At post-treatment, depressed participants with higher frontal alpha EEG asymmetry showed a positive correlation with behavioral inhibition and behavioral avoidance.                                                                                                                | III |
| Sankar et al., 2015                               | Case-control | 16 depressed patients who received CBT vs. 16 matched controls                                                         | 16 weekly sessions             | Extreme attributions on the DAS were related to greater activity in regions (left hippocampal region, inferior parietal lobe and precuneus) associated with attentional processing and memory retrieval in MDD patients compared to healthy controls. Left parahippocampal activation to extreme attributions decreased in both depressed patients and healthy controls at the follow-up scans in both groups but to a lesser extent in patients.                                         | III |
| Elliott, Sahakian, Michael, Paykel, & Dolan, 1998 | Case-control | Six patients with MDD receiving medication and six matched controls                                                    | Previous CBT treatment unknown | Compared to controls, response to feedback on cognitive task in patients with unipolar depression is associated with attenuation of activation within a network including the medial caudate nucleus and ventrolateral orbitofrontal cortex, regions implicated in reward mechanisms.                                                                                                                                                                                                     | III |
| Pizzagalli et al., 2009                           | Case-control | 30 unmedicated individuals with MDD and 31 healthy comparison subjects                                                 | Previous CBT treatment unknown | Compared to healthy subjects, MDD patients reported reduced positive affect to reward stimuli and less arousal following gains. These findings were mirrored by group differences in basal ganglia responses to rewarding outcomes, as participants with major depression showed weaker responses to gains in the caudate bilaterally and in the left nucleus accumbens. There was less evidence of differences between patients and healthy subjects during reward anticipation.         | III |
| McCabe, Cowen, & Harmer, 2009                     | Case-control | 13 unmedicated recovered patients with a history of major depression and 14 healthy controls matched on age and gender | Previous CBT treatment unknown | Unmedicated recovered depressed patients demonstrate abnormalities in the neural representation of reward to the sight and taste of chocolate (i.e. ventral striatum, caudate nucleus, neural supralinearity response). These impaired neural responses were not attributable to subjective changes in how the reward was anticipated or experienced. The functional magnetic resonance imaging (fMRI) results remained significant when the depression scores were added as a covariate. | III |

|                                                  |              |                                                                                                                           |                                            |                                                                                                                                                                                                                                                                                                                                                                                                                                                                                                                                                                                                            |     |
|--------------------------------------------------|--------------|---------------------------------------------------------------------------------------------------------------------------|--------------------------------------------|------------------------------------------------------------------------------------------------------------------------------------------------------------------------------------------------------------------------------------------------------------------------------------------------------------------------------------------------------------------------------------------------------------------------------------------------------------------------------------------------------------------------------------------------------------------------------------------------------------|-----|
| Knutson, Bhanji, Cooney, Atlas, & Gottlib, 2008  | Case-control | 14 currently depressed and 12 never-depressed participants                                                                | Current and previous CBT treatment unknown | Depressed individuals show similarities to never-depressed CTL participants in their neural (nucleus accumbens (NAcc)) and affective responses to monetary incentives. However, they showed differences compared to never-depressed participants in activation of the anterior cingulate cortex during anticipation of increasing loss or gains and a weaker response to gain outcomes in the mesial prefrontal cortex and dorsal striatal.                                                                                                                                                                | III |
| Smoski et al., 2010                              | Case-control | 16 depressed and 15 control participants                                                                                  | Previous CBT treatment unknown             | The MDD group was characterized by reduced activation of striatal reward regions during reward selection, reward anticipation, and reward feedback. Support was not found for hyperresponsivity of cognitive control regions during reward selection or reward anticipation. MDD participants showed hyperresponsivity in orbitofrontal cortex during reward selection and decreased activation of the middle frontal gyrus and the rostral cingulate gyrus during reward selection and anticipation. Activation in bilateral midfrontal gyrus during reward selection was related to depression severity. | III |
| Tavares et al., 2009                             | Case-control | 13 depressed subjects with major depressive disorder, 12 depressed subjects with bipolar disorder and 15 healthy controls | Current and previous CBT treatment unknown | The MDD subjects showed attenuated prefrontal cortical responses during reversal shifting and failed to deactivate the amygdala in response to misleading feedback relative to positive feedback.                                                                                                                                                                                                                                                                                                                                                                                                          | III |
| Tucker, Luu, Frishkoff, Quiring, & Poulsen, 2003 | Case-control | 20 MDD patients and 20 controls                                                                                           | Previous CBT treatment unknown             | Depressed subjects showed a larger medial frontal negativity for all feedback compared with control subjects with a particularly striking response to the most negative feedback while an exaggerated limbic activity of depressed subjects was seen in response to negative feedback on their performance. The effect was the strongest to patients that were moderately depressed.                                                                                                                                                                                                                       | III |
| Santesso et al., 2011                            | Case-control | 12 participants with remitted depression and 15 controls                                                                  | Previous CBT treatment unknown             | Despite equivalent behavioral performance, RD subjects showed larger feedback related negativity using EEG to negative feedback relative to controls; group differences remained after accounting for residual anxiety and depressive symptoms.                                                                                                                                                                                                                                                                                                                                                            | III |

|                                |              |                                                                                                                                        |                                                                      |                                                                                                                                                                                                                                                                                                                                                                                                                                                                     |     |
|--------------------------------|--------------|----------------------------------------------------------------------------------------------------------------------------------------|----------------------------------------------------------------------|---------------------------------------------------------------------------------------------------------------------------------------------------------------------------------------------------------------------------------------------------------------------------------------------------------------------------------------------------------------------------------------------------------------------------------------------------------------------|-----|
| Chiu, & Deldin, 2007           | Case-control | 17 nondepressed comparison subjects and 18 depressed individuals                                                                       | 5 depressed patients following current psychotherapy (type unknown). | Depressed individuals exhibited greater magnitude of error-related negativity and a different response to different incentives compared to nonpsychiatric comparison subjects during a cognitive task related to punishment and reward.                                                                                                                                                                                                                             | III |
| Holmes & Pizzagalli, 2008      | Case-control | 20 unmedicated patients with MDD and 20 demographically matched comparison subjects.                                                   | Current and previous CBT treatment unknown.                          | Relative to comparison subjects, patients with MDD displayed significantly larger error-related negativity and higher density in rostral ACC and medial PFC regions in reaction to committing errors.                                                                                                                                                                                                                                                               | III |
| Ruchow et al., 2004            | Case-control | 16 patients with DSM-IV major depressive disorder in remission and 16 matched controls                                                 | Current and previous CBT treatment unknown.                          | Depressed patients showed a smaller feedback ERN/Ne (error-related negativity/error negativity) component following an incorrect response following error trials (but not following correct trials) of a cognitive task.                                                                                                                                                                                                                                            | III |
| Steele, Meyer, & Ebmeier, 2004 | Case-control | 15 patients with major depressive illness, 14 healthy controls                                                                         | Current and previous CBT treatment unknown.                          | A predictive error signal in response to a gambling task was related to different brain activity in depressed patients versus controls. Additionally, for some brain regions, the magnitude of the error signal correlated with Hamilton depression rating of illness severity.                                                                                                                                                                                     | III |
| Kumar et al., 2008             | Case-control | 15 medicated patients with MDD and 18 controls that participated twice: in an unmedicated state (n=18) and in a medicated state (n=15) | Current and previous CBT treatment unknown.                          | Compared with healthy control subjects, medicated depressed patients showed blunted reward learning signals (reduced activations and deactivations) in the ventral striatum (VS), rostral and dorsal anterior cingulate (ACC), retrosplenial cortex (RC), midbrain and hippocampus, as well as increased responses in the ventral tegmental area during a reward-learning task. Abnormal signals in several of the brain areas correlated with depression severity. | III |
| Meyer et al., 2004             | Case-control | 20 depressed patients vs. 20 controls                                                                                                  | Current and previous CBT treatment unknown.                          | Highly negative dysfunctional attitudes were related to higher serotonin transporter (5-HTT) density in regions with 5-HT nerve terminals. 5-HTT density was higher in the depressed subjects with highly abnormal DAS scores compared to the controls.                                                                                                                                                                                                             | III |



|                                   |              |                                                                          |                                             |                                                                                                                                                                                                                                                                                                                                                                                                                                                                                                                                                                                                                                                            |     |
|-----------------------------------|--------------|--------------------------------------------------------------------------|---------------------------------------------|------------------------------------------------------------------------------------------------------------------------------------------------------------------------------------------------------------------------------------------------------------------------------------------------------------------------------------------------------------------------------------------------------------------------------------------------------------------------------------------------------------------------------------------------------------------------------------------------------------------------------------------------------------|-----|
| Wang, Zhou, Dai, Ji, & Feng, 2017 | Case-control | Twelve drug-free depressed patients and fifteen matched healthy controls | Current and previous CBT treatment unknown. | Behavior inhibition and activation (approach/avoidance motivation) was related to activity in different brain areas during reappraisal of emotional pictures with approach/avoidant strategies in depressed patients compared to healthy controls.                                                                                                                                                                                                                                                                                                                                                                                                         | III |
| Yang et al., 2015                 | Case-control | Patients with first-episode MDD (N=25) and healthy controls (N=25)       | Current and previous CBT treatment unknown. | Patients with MDD showed significantly weaker responses in the left caudate nucleus when contrasting the 'high reward'-'low reward' condition, and blunted responses in the left superior temporal gyrus and the right caudate nucleus when contrasting high and low probabilities. In addition, they showed less deactivation at the middle frontal gyrus and a blunted response at the left medial frontal gyrus, the right thalamus and the cingulate gyrus during high reward probability conditions. A negative correlation between performance on a decision-making task and activation at the superior temporal gyrus was observed in MDD patients. | III |

#### Learning processes and CBT outcome

|                            |                                         |                                                |                                                                                                                       |                                                                                                |                                                                                                                                                                                                                                                                              |    |
|----------------------------|-----------------------------------------|------------------------------------------------|-----------------------------------------------------------------------------------------------------------------------|------------------------------------------------------------------------------------------------|------------------------------------------------------------------------------------------------------------------------------------------------------------------------------------------------------------------------------------------------------------------------------|----|
| <i>Cognitive processes</i> | Ekeblad, Falkenstrom, & Holmqvist, 2015 | Prospective cohort study without control group | MDD patients were randomized to either CBT (n=48) or interpersonal psychotherapy (IPT) (n=48)                         | 14 sessions                                                                                    | Patients with higher (depression-specific) reflective functioning had better outcomes on self-rated depression. Type of treatment did not moderate results.                                                                                                                  | IV |
|                            | Beard et al., 2015                      | Prospective cohort study without control group | MDD (n = 21), bipolar I disorder (n = 5), bipolar II disorder (n=2) and mood disorder not otherwise specified (n = 4) | Five 50-min group sessions each day and 2–3 weekly individual sessions in an average of 8 days | Baseline post-error accuracy on a cognitive control task predicted (while controlling for baseline depression scores) attentional control and rumination but not depression after treatment.                                                                                 | IV |
|                            | Goodkind et al., 2013                   | Prospective cohort study without control group | 55 patients with MDD aged 60 or older                                                                                 | 12 sessions                                                                                    | Measures of executive functioning (Wisconsin Card Sort Task (WCST) were completed at baseline. Worse performance on the WCST was associated with better change in depression. The verbal fluency and the Stroop task performance were not associated with treatment outcome. | IV |

|                           |                        |                                                |                                                                                                                                                             |                                                                                    |                                                                                                                                                                                                                                                                                                                                                                                                                                                                                                                                                                                                                                                          |     |
|---------------------------|------------------------|------------------------------------------------|-------------------------------------------------------------------------------------------------------------------------------------------------------------|------------------------------------------------------------------------------------|----------------------------------------------------------------------------------------------------------------------------------------------------------------------------------------------------------------------------------------------------------------------------------------------------------------------------------------------------------------------------------------------------------------------------------------------------------------------------------------------------------------------------------------------------------------------------------------------------------------------------------------------------------|-----|
|                           | Thompson et al., 2015  | Prospective cohort study without control group | 60 patients with MDD (≥ 59 years)                                                                                                                           | 12 weeks of CBT                                                                    | Neurocognitive measures of WCST performance (i.e. measuring executive functioning) were not significant predictors of better CBT outcome. No associations between predictors and baseline depression severity.                                                                                                                                                                                                                                                                                                                                                                                                                                           | IV  |
|                           | Yang et al., 2018      | Prospective cohort study with control group    | 28 patients with MDD, 53 patients with PTSD and 23 healthy control subjects: in this group 17 patient with MDD and 34 patients with PTSD volunteered in CBT | Patients received 12 weeks of CBT for MDD or cognitive processing therapy for PTSD | Improvement in reaction time on a cognitive and emotional control task during CBT was correlated to improvement in depressive symptoms. Healthy subjects did not show improvement in reaction time.                                                                                                                                                                                                                                                                                                                                                                                                                                                      | II  |
|                           | Spinhoven et al., 2006 | Prospective cohort study with control group    | Participants with MDD allocated to CT (n=60) or treatment as usual (n=56)                                                                                   | 8 sessions group CT                                                                | Autobiographical memory and neurocognitive variables at pretreatment did not predict relapse or recurrence.                                                                                                                                                                                                                                                                                                                                                                                                                                                                                                                                              | II  |
|                           | Hummel et al., 2017    | Prospective cohort study without control group | Depressed elder (age > 65) randomized into CBT (n=56) versus waiting list control group with usual care (n=99)                                              | 15 weekly 90-minute group sessions (first and last session individual)             | Cognitive functioning at baseline was related to post-treatment depression.                                                                                                                                                                                                                                                                                                                                                                                                                                                                                                                                                                              | IV  |
| Neurobiological processes | Fu et al., 2008        | Prospective cohort study with control group    | 16 depressed patients vs. 16 matched healthy volunteers                                                                                                     | 16 sessions                                                                        | Patients with the most clinical improvement seemed more comparable to healthy subjects at baseline. Patients who had at baseline the lowest activity in the area from the right inferior frontal gyres to the insula and the left putamen/globus pallidus, the highest load-response activity in the left inferior frontal gyrus and lowest load-response in the anterior cingulate, right middle frontal, right insula/inferior frontal gyrus and putamen had the greatest clinical improvement. These correlations were not confounded by initial depression severity, as no regions showed a significant relationship with baseline depression score. | III |

|                                          |                                                |                                                                 |                    |                                                                                                                                                                                                                                                                                                                                                                                                                                                                                                  |     |
|------------------------------------------|------------------------------------------------|-----------------------------------------------------------------|--------------------|--------------------------------------------------------------------------------------------------------------------------------------------------------------------------------------------------------------------------------------------------------------------------------------------------------------------------------------------------------------------------------------------------------------------------------------------------------------------------------------------------|-----|
| Stange et al., 2017                      | Prospective cohort study without control group | 32 patients with MDD and/or social anxiety disorders            | 12 weeks           | Patients with larger pre-treatment enhanced attention toward aversive stimuli as measured by late positive potentials (LPP, a form of event related potentials) relative to neutral distracters were more likely to respond to CBT and demonstrated larger reductions in symptoms of depression and anxiety after controlling for pre-treatment depression.                                                                                                                                      | IV  |
| Sankar et al., 2015                      | Prospective cohort study with control group    | 16 depressed patients vs. 16 matched controls                   | 16 weekly sessions | Increase in activity in the left precentral gyrus during processing of dysfunctional attitudes was related to greater change in depression. Healthy controls did not show an increase in activity in this area.                                                                                                                                                                                                                                                                                  | III |
| Stange, MacNamara, Kennedy, et al., 2017 | Prospective cohort study without control group | 39 patients with anxiety and/or depression                      | 12 weeks           | LPP (i.e. form of event related potentials related to attention to emotional information) and reaction time did not distinguish CBT responders from nonresponders, but individuals who demonstrated greater ability to benefit behaviorally (i.e., faster reaction times) from smaller LPPs (i.e. showing greater brain-behavioral adaptability) were more likely to respond to treatment and showed greater improvements in depressive symptoms after controlling for pre-treatment depression. | IV  |
| Siegle, Carter, & Thase, 2006            | Prospective cohort study with control group    | 14 depressed patients vs. 21 controls                           | 16 sessions        | Participants whose sustained reactivity to emotional stimuli was low in the subgenual cingulate cortex and high in the amygdala displayed the strongest improvement controlling for initial depression severity.                                                                                                                                                                                                                                                                                 | III |
| Ritchey et al., 2011                     | Prospective cohort study with control group    | 11 depressed patients vs. 14 controls                           | 20 sessions        | Patients with less impairment in areas involved in cognitive control processes in the context of emotional processing but more impairment in areas involved in negative emotional biases showed better treatment response. Amygdala, caudal or hippocampal activity was not related to treatment response.                                                                                                                                                                                       | III |
| Gollan et al., 2014                      | Prospective cohort study with control group    | Depressed (n=37) and healthy participants (n = 35) receiving BA | 16 weekly sessions | Pre-treatment alpha electroencephalogram (EEG) asymmetry, assumed to be involved in motivation approach- and withdrawal-related motivation, was significantly higher in depressed than healthy participants at pre-treatment and predicted negative affect at post-treatment, but not remission to treatment.                                                                                                                                                                                    | III |

|                                                |                                                |                                                                                                  |                |                                                                                                                                                                                                                                                                                                     |     |
|------------------------------------------------|------------------------------------------------|--------------------------------------------------------------------------------------------------|----------------|-----------------------------------------------------------------------------------------------------------------------------------------------------------------------------------------------------------------------------------------------------------------------------------------------------|-----|
| McGrath et al., 2013                           | Prospective cohort study with control group    | Depressed patients randomized into CBT (n=41) vs. Escitalopram (n=39)                            | 16 sessions    | Baseline insula (an area involved in the translation of experience into feelings) activity differentiated between responders to CBT and escitalopram: hypometabolism was associated with remission in CBT, hypermetabolism was associated with remission in escitalopram.                           | II  |
| Rubin-Falcone et al., 2017                     | Prospective cohort study with control group    | 23 depressed patients vs. 12 healthy controls                                                    | 14 sessions    | Greater reduction in reduction in brain areas related to emotion regulation from pre- to post-treatment was associated with better treatment outcome controlling for baseline depression. Baseline performance of the neural correlates of emotion regulation was not related to treatment outcome. | III |
| Burkhouse et al., 2016                         | Prospective cohort study with control group    | Patients with anxiety without depression (n=30) and comorbid anxiety and depression (CAD; n=22). | 12 sessions    | Those with reduced neural reactivity to reward at baseline (REWP) were more likely to respond to treatment. A reduced REWP was also associated with a greater pre-to-post CBT reduction in depressive symptoms among individuals with CAD, but not among individuals with pure anxiety.             | II  |
| Costafreda, Khanna, Mourao-Miranda, & Fu, 2009 | Prospective cohort study without control group | 16 medication-free individuals with MDD                                                          | 16 sessions    | Baseline activity in different brain areas during a sad facial expression task (related to affective and interpersonal processing) was related to clinical response to CBT.                                                                                                                         | IV  |
| Crowther et al., 2015                          | Prospective cohort study with control group    | 23 unmedicated outpatients with MDD and 20 matched non-depressed controls                        | 12 sessions BA | Response to psychotherapy in the MDD group was predicted by pretreatment greater connectivity between the right insula and the (right) middle temporal gyrus and between the left intraparietal sulcus and the orbital frontal cortex.                                                              | III |

|                                                         |                                                |                                                                                                                                                                                |                        |                                                                                                                                                                                                                                                                                                                                                                                                           |     |
|---------------------------------------------------------|------------------------------------------------|--------------------------------------------------------------------------------------------------------------------------------------------------------------------------------|------------------------|-----------------------------------------------------------------------------------------------------------------------------------------------------------------------------------------------------------------------------------------------------------------------------------------------------------------------------------------------------------------------------------------------------------|-----|
| Seminowicz et al., 2004                                 | Prospective cohort study with control group    | 119 depressed patients receiving CBT (n=14) or antidepressants (unmedicated during scan) and 42 healthy controls                                                               | 15 sessions            | Lastly, limbic–cortical and cortical–cortical path differences differentiated responders to CBT from responders to pharmacotherapy.                                                                                                                                                                                                                                                                       | II  |
| Fujino et al., 2015                                     | Prospective cohort study without control group | 10 MDD patients                                                                                                                                                                | 16 sessions            | The degree of improvement in depressive symptoms was positively correlated with gray matter volume in an area involved in multiple cognitive functions, the caudal portion of the anterior cingulate cortex.                                                                                                                                                                                              | IV  |
| Gourgouvelis, Yilder, Clarke, Behbahani, & Murphy, 2018 | Prospective cohort study with control group    | 8 medicated MDD patients performed an 8-week exercise intervention in addition to cognitive behavioral group therapy (CBGT) versus 8 medicated patients who attended CBGT only | 8 weeks                | Greater increase in brain-derived neurotrophic factor (BDNF) was related to greater improvement in depression and sleep quality, but BDNF increased more in the CBGT + exercise group.                                                                                                                                                                                                                    | III |
| Webb et al., 2018                                       | Prospective cohort study with control group    | MDD patients were randomized into internet CBT (iCBT) (n=37) versus control (n=40)                                                                                             | 6 sessions in 10 weeks | Larger pretreatment right rostral (but not left or subgenual) anterior cingulate cortex (ACC) volume was a significant predictor of greater depressive symptom improvement in iCBT when controlling for demographic and clinical variables. In addition, pretreatment right rostral ACC volume was larger among patients receiving iCBT whose depression remitted relative to patients who did not remit. | II  |
| Thompson et al., 2015                                   | Prospective cohort study without control group | 60 MDD outpatients (age 59 years and older) following CBT                                                                                                                      | 12 weeks               | Decreased activation in the left inferior frontal triangle and right superior frontal gyrus as well as increased activity in the right middle frontal gyrus and left superior frontal gyrus during performance of the Wisconsin Card Sort Task pre-treatment predicted a positive response to CBT.                                                                                                        | IV  |

---

*Note.* Levels of evidence: Level 1 (I) = meta-analyses or experimental studies with a sample size  $n > 50$ , such as randomized-controlled clinical trials or experiments in which the independent variable is manipulated; Level 2 (II) = Experimental studies with a small sample size  $n < 50$  or a prospective cohort study with a control group and sample size  $> 50$ ; Level 3 (III) =, non-randomized controlled trial, prospective cohort study with control group but small sample size  $< 50$  or case-control studies; Level 4 (IV) = case-series, cohort study without control group or nonrandomized uncontrolled trials; Level 5 (V) = case ( $n = 1$ ) studies or expert opinions. Note that some studies are included twice because they provide evidence for more than one of the described relations and that their design and level of evidence may be different for the different relations; BA= behavioral activation; CT = Cognitive Therapy; CBT= Cognitive Behavioral Therapy; MDD= Major Depressive Disorder; NA= not applicable; PTSD= Post Traumatic Stress Disorder; RCT = randomized controlled trial.

## References supplementary materials 2

- Beard, C., Donahue, R. J., Dillon, D. G., Van't Veer, A., Webber, C., Lee, J., ... Pizzagalli, D. A. (2015). Abnormal error processing in depressive states: A translational examination in humans and rats. *Translational Psychiatry*, 5(5). <https://doi.org/10.1038/tp.2015.54>
- Burkhouse, K. L., Kujawa, A., Kennedy, A. E., Shankman, S. A., Langenecker, S. A., Phan, K. L., & Klumpp, H. (2016). Neural Reactivity To Reward As a Predictor of Cognitive Behavioral Therapy Response in Anxiety and Depression. *Depression and Anxiety*, 33(4), 281–288. <https://doi.org/10.1002/da.22482>
- Chiu, P. H., & Deldin, P. J. (2007). Neural evidence for enhanced error detection in major depressive disorder. *American Journal of Psychiatry*, 164(4), 608–616. <https://doi.org/10.1176/ajp.2007.164.4.608>
- Costafreda, S. G., Khanna, A., Mourao-Miranda, J., & Fu, C. H. Y. (2009). Neural correlates of sad faces predict clinical remission to cognitive behavioural therapy in depression. *NeuroReport*, 20(7), 637–641. <https://doi.org/10.1097/WNR.0b013e3283294159>
- Crowther, A., Smoski, M. J., Minkel, J., Moore, T., Gibbs, D., Petty, C., ... Dichter, G. S. (2015). Resting-state connectivity predictors of response to psychotherapy in major depressive disorder. *Neuropsychopharmacology*, 40(7), 1659–1663. <https://doi.org/10.1038/npp.2015.12>
- DelDonno, S. R., Jenkins, L. M., Crane, N. A., Nusslock, R., Ryan, K. A., Shankman, S. A., ... Langenecker, S. A. (2017). Affective traits and history of depression are related to ventral striatum connectivity. *Journal of Affective Disorders*, 221(October 2016), 72–80. <https://doi.org/10.1016/j.jad.2017.06.014>
- Dichter, G. S., Felder, PettyE, Bizzell, O., Ernst, M., & Smoski. (2009). The Effects of Psychotherapy on Neural Responses to Rewards in Major Depression, 66(9), 886–897. <https://doi.org/10.1016/j.biopsych.2009.06.021>
- Ekeblad, A., Falkenstrom, F., & Holmqvist, R. (2015). Reflective Functioning as Predictor of Working Alliance and Outcome in the Treatment of Depression. *Journal of Consulting and Clinical Psychology*, 84(1), 67–78. <https://doi.org/10.1037/ccp0000055>
- Elliott, R., Sahakian, B. J., Michael, A., Paykel, E. S., & Dolan, R. J. (1998). Abnormal neural response to feedback on planning and guessing tasks in patients with unipolar depression. *Psychological Medicine*, 28(3), 559–571. <https://doi.org/10.1017/S0033291798006709>
- Fu, C. H. Y., Williams, S. C. R., Cleare, A. J., Scott, J., Mitterschiffthaler, M. T., Walsh, N. D., ... Murray, R. M. (2008). Neural Responses to Sad Facial Expressions in Major Depression Following Cognitive Behavioral Therapy. *Biological Psychiatry*, 64(6), 505–512. <https://doi.org/10.1016/j.biopsych.2008.04.033>
- Fujino, J., Yamasaki, N., Miyata, J., Sasaki, H., Matsukawa, N., Takemura, A., ... Murai, T. (2015). Anterior cingulate volume predicts response to cognitive behavioral therapy in major depressive disorder. *Journal of Affective Disorders*, 174, 397–399. <https://doi.org/10.1016/j.jad.2014.12.009>
- Gawrysiak, M. J., Carvalho, J. P., Rogers, B. P., Nicholas, C. R. N., Dougherty, J. H., & Hopko, D. R. (2012). Neural Changes following Behavioral Activation for a Depressed Breast Cancer Patient: A Functional MRI Case Study. *Case Reports in Psychiatry*, 2012, 1–8. <https://doi.org/10.1155/2012/152916>
- Gemar, M. C., Segal, Z. V., Sagrati, S., & Kennedy, S. J. (2001). Mood-Induced Changes on the Implicit Association Test in Recovered Depressed Patients. *Journal of Abnormal Psychology*, 110(2), 282–289. <https://doi.org/10.1037/0021-843X.110.2.282>
- Goldapple, K., Segal, Z., Garson, C., & Lau, M. (2004). Modulation of Cortical-Limbic Pathways in Major Depression : Treatment-Specific ... *Arch Gen Psychiatry*, 61, 34–41. <https://doi.org/10.1001/archpsyc.61.1.34>

- Gollan, J. K., Hoxha, D., Chihade, D., Pflieger, M. E., Rosebrock, L., & Cacioppo, J. (2014). Frontal alpha EEG asymmetry before and after behavioral activation treatment for depression. *Biological Psychology*, 99(1), 198–208. <https://doi.org/10.1016/j.biopsycho.2014.03.003>
- Goodkind, M. S., Gallagher-Thompson, D., Thompson, L. W., Kesler, S. R., Anker, L., Flournoy, J., ... O'Hara, R. M. (2015). The impact of executive function on response to cognitive behavioral therapy in late-life depression. *International Journal of Geriatric Psychiatry*, 31(4), 334–339. <https://doi.org/10.1002/gps.4325>
- Gourgouvelis, J., Yelder, P., Clarke, S. T., Behbahani, H., & Murphy, B. A. (2018). Exercise leads to better clinical outcomes in those receiving medication plus cognitive behavioral therapy for major depressive disorder. *Frontiers in Psychiatry*, 9(MAR). <https://doi.org/10.3389/fpsy.2018.00037>
- Groves, Porter, R. J., Jordan, J., Knight, R., Carter, J. D., McIntosh, V. V. W., ... Joyce, P. R. (2015). Changes in neuropsychological function after treatment with metacognitive therapy or cognitive behavior therapy for depression. *Depression and Anxiety*, 32(6), 437–444. <https://doi.org/10.1002/da.22341>
- Holmes, A. J., & Pizzagalli, D. A. (2008). Spatiotemporal dynamics of error processing dysfunctions in major depressive disorder 29. *Arch Gen Psychiatry*, 65(1538–3636 (Electronic)), 179–188. <https://doi.org/10.1001/archgenpsychiatry.2007.19>
- Hummel, J., Weisbrod, C., Boesch, L., Himpler, K., Hauer, K., Hautzinger, M., ... Kopf, D. (2017). AIDE–Acute Illness and Depression in Elderly Patients. Cognitive Behavioral Group Psychotherapy in Geriatric Patients With Comorbid Depression: A Randomized, Controlled Trial. *Journal of the American Medical Directors Association*, 18(4), 341–349. <https://doi.org/10.1016/j.jamda.2016.10.009>
- Johnco, C., Wuthrich, V. M., & Rapee, R. M. (2015). The impact of late-life anxiety and depression on cognitive flexibility and cognitive skill acquisition. *Depression and Anxiety*, 32(10), 754–762. <https://doi.org/10.1002/da.22375>
- Kennedy, S. H., Jakub, Z., Zindel, V., Mark, A., Bieling, P. J., McIntyre, R. S., & Mayberg, H. S. (2007). Differences in Brain Glucose Metabolism Between Responders to CBT and ..., (May), 778–788.
- Knutson, B., Bhanji, J. P., Cooney, R. E., Atlas, L. Y., & Gotlib, I. H. (2008). Neural Responses to Monetary Incentives in Major Depression. *Biological Psychiatry*, 63(7), 686–692. <https://doi.org/10.1016/j.biopsych.2007.07.023>
- Kumar, P., Waiter, G., Ahearn, T., Milders, M., Reid, I., & Steele, J. D. (2008). Abnormal temporal difference reward-learning signals in major depression. *Brain*, 131(8), 2084–2093. <https://doi.org/10.1093/brain/awn136>
- McCabe, C., Cowen, P. J., & Harmer, C. J. (2009). Neural representation of reward in recovered depressed patients. *Psychopharmacology*, 205(4), 667–677. <https://doi.org/10.1007/s00213-009-1573-9>
- McGrath, C. L., Kelley, M. E., Holtzheimer, III, P. E., Dunlop, B. W., Craighead, W. E., Franco, A. R., ... Mayberg, H. S. (2013). Toward a Neuroimaging Treatment Selection Biomarker for Major Depressive Disorder. *Jama Psychiatry*, 70(8), 821–829. <https://doi.org/10.1001/jamapsychiatry.2013.143>
- Meyer, J. H., Houle, S., S, S., A, C., D.F., H., Ginovart, N., ... Wilson, A. . (2004). Brain Serotonin Transporter Binding Potential Measured With Carbon 11–Labeled DASB Positron Emission Tomography. *Arch Gen Psychiatry*, 61(12), 1271–1279. <https://doi.org/10.1001/archpsyc.61.12.1271>
- Pearson, R. M., O'Mahen, H., Burns, A., Bennert, K., Shepherd, C., Baxter, H., ... Evans, J. (2013). The normalisation of disrupted attentional processing of infant distress in depressed pregnant women following Cognitive Behavioural Therapy. *Journal of Affective Disorders*, 145(2), 208–213. <https://doi.org/10.1016/j.jad.2012.07.033>
- Pizzagalli, D. A., Holmes, A. J., Dillon, D. G., Goetz, E. L., Birk, J. L., Bogdan, R., ... Fava, M. (2009). Reduced caudate and nucleus accumbens response to rewards in unmedicated subjects with major depressive disorder. *American Journal of Psychiatry*, 166(June), 702–710. <https://doi.org/10.1176/appi.ajp.2008.08081201.Reduced>
- Ritchey, M., Dolcos, F., Eddington, K., Strauman, T., & Cabezza, R. (2011). Neural correlates of emotional processing in depression: changes with cognitive behavioral therapy and predictors of treatment response. *Journal of Psychiatric Research*, 45(5), 577–587. <https://doi.org/10.1016/j.jpsychires.2010.09.007.Neural>

- Romero, N., Sanchez, A., & Vazquez, C. (2014). Memory biases in remitted depression: The role of negative cognitions at explicit and automatic processing levels. *Journal of Behavior Therapy and Experimental Psychiatry*, 45(1), 128–135. <https://doi.org/10.1016/j.jbtep.2013.09.008>
- Rubin-Falcone, H., Weber, J., Kishon, R., Ochsner, K., Delaparte, L., Doré, B., ... Miller, J. M. (2017). Longitudinal effects of cognitive behavioral therapy for depression on the neural correlates of emotion regulation. *Psychiatry Research: Neuroimaging*, (October). <https://doi.org/10.1016/j.pscychresns.2017.11.002>
- Ruchow, M., Herrnberger, B., Wiesend, C., Grön, G., Spitzer, M., & Kiefer, M. (2004). The effect of erroneous responses on response monitoring in patients with major depressive disorder: A study with event-related potentials. *Psychophysiology*, 41(6), 833–840. <https://doi.org/10.1111/j.1469-8986.2004.00237.x>
- Sankar, A., Scott, J., Paszkiewicz, A., Giampietro, V. P., Steiner, H., & Fu, C. H. Y. (2015). Neural effects of cognitive-behavioural therapy on dysfunctional attitudes in depression. *Psychological Medicine*, 45(7), 1425–1433. <https://doi.org/10.1017/S0033291714002529>
- Santesso, D. L., Steele, K. T., Bogdan, R., Holmes, A. J., Christen, M., Meites, T. M., ... Behavior, M. (2011). Enhanced Negative Feedback Responses in Remitted Depression. *NeuroReport*, 19(10), 1045–1048. <https://doi.org/10.1097/WNR.0b013e3283036e73>
- Seminowicz, D. A., Mayberg, H. S., McIntosh, A. R., Goldapple, K., Kennedy, S., Segal, Z., & Rafi-Tari, S. (2004). Limbic-frontal circuitry in major depression: A path modeling metanalysis. *NeuroImage*, 22(1), 409–418. <https://doi.org/10.1016/j.neuroimage.2004.01.015>
- Sheppard, L. C., & Teasdale, J. D. (2000). Dysfunctional thinking in major depressive disorder: a deficit in metacognitive monitoring? *Journal of Abnormal Psychology*, 109(4), 768–776. <https://doi.org/10.1037/0021-843X.109.4.768>
- Sheppard, & Teasdale, J. D. (2004). How does dysfunctional thinking decrease during recovery from major depression? *Journal of Abnormal Psychology*, 113(1), 64–71. <https://doi.org/10.1037/0021-843X.113.1.64>
- Shou, H., Yang, Z., Satterthwaite, T. D., Cook, P. A., Bruce, S. E., Shinohara, R. T., & Sheline, Y. I. (2017). Cognitive behavioral therapy increases amygdala connectivity with the cognitive control network in both MDD and PTSD. *NeuroImage: Clinical*. <https://doi.org/10.1016/j.nicl.2017.01.030>
- Siegle, G. J., Carter, C. S., & Thase, M. E. (2006). Use of fMRI to predict recovery from unipolar depression with cognitive behavior therapy. *American Journal of Psychiatry*, 163(4), 735–738. <https://doi.org/10.1176/appi.ajp.163.4.735>
- Smoski, Felder, Bizzell, Green, Ernst, Lynch, & Dichter. (2009). FMRI of Alterations in Reward Selection, Anticipation, and Feedback in Major Depressive Disorder. *Journal of Affective Disorders*, 118, 69–78. <https://doi.org/10.1016/j.jad.2009.01.034>
- Spinhoven, P., Bockting, C. L. H., Schene, A. H., Koeter, M. W. J., Wekking, E. M., & Williams, J. M. G. (2006). Autobiographical memory in the euthymic phase of recurrent depression. *Journal of Abnormal Psychology*, 115(3), 590–600. <https://doi.org/10.1037/0021-843X.115.3.590>
- Stange, J. P., MacNamara, A., Barnas, O., Kennedy, A. E., Hajcak, G., Phan, K. L., & Klumpp, H. (2017). Neural markers of attention to aversive pictures predict response to cognitive behavioral therapy in anxiety and depression. *Biological Psychology*, 123, 269–277. <https://doi.org/10.1016/j.biopsycho.2016.10.009>
- Stange, J. P., MacNamara, A., Kennedy, A. E., Hajcak, G., Phan, K. L., & Klumpp, H. (2017). Brain-behavioral adaptability predicts response to cognitive behavioral therapy for emotional disorders: A person-centered event-related potential study. *Neuropsychologia*, (January), 1–8. <https://doi.org/10.1016/j.neuropsychologia.2017.06.027>
- Steele, J. D., Meyer, M., & Ebmeier, K. P. (2004). Neural predictive error signal correlates with depressive illness severity in a game paradigm. *NeuroImage*, 23(1), 269–280. <https://doi.org/10.1016/j.neuroimage.2004.04.023>
- Tavares, J. V. T., Clark, Furey, Williams, Sahakiana, & Drevets. (2009). NIH Public Access, 42(December 2006), 1118–1126. <https://doi.org/10.1016/j.neuroimage.2008.05.049>
- Thompson, D. G., Kesler, S. R., Sudheimer, K., Mehta, K. M., Thompson, L. W., Marquett, R. M., ... O'Hara, R. M. (2015). FMRI activation during executive function predicts response to cognitive behavioral therapy in older, depressed adults. *American Journal of Geriatric Psychiatry*, 23(1), 13–22. <https://doi.org/10.1016/j.jagp.2014.02.001>



- Tucker, D. M., Luu, P., Frishkoff, G., Quiring, J., & Poulsen, C. (2003). Frontolimbic Response to Negative Feedback in Clinical Depression. *Journal of Abnormal Psychology*, 112(4), 667–678. <https://doi.org/10.1037/0021-843X.112.4.667>
- Wang, X., Zhou, X., Dai, Q., Ji, B., & Feng, Z. (2017). The Role of Motivation in Cognitive Reappraisal for Depressed Patients. *Frontiers in Human Neuroscience*, 11(October), 1–12. <https://doi.org/10.3389/fnhum.2017.00516>
- Webb, C. A., Olson, E. A., Killgore, W. D. S., Pizzagalli, D. A., Rauch, S. L., & Rosso, I. M. (2018). Rostral Anterior Cingulate Cortex Morphology Predicts Treatment Response to Internet-Based Cognitive Behavioral Therapy for Depression. *Biological Psychiatry: Cognitive Neuroscience and Neuroimaging*, 3(3), 255–262. <https://doi.org/10.1016/j.bpsc.2017.08.005>
- Wenzlaff, R. M., & Bates, D. E. (1998). Unmasking a cognitive vulnerability to depression: how lapses in mental control reveal depressive thinking. *Journal of Personality and Social Psychology*, 75(6), 1559–1571. <https://doi.org/10.1037/0022-3514.75.6.1559>
- Yang, Huang, J., Lan, Y., Zhu, C. ying, Liu, X. qun, Wang, Y. fei, ... Chan, R. C. K. (2015). Diminished caudate and superior temporal gyrus responses to effort-based decision making in patients with first-episode major depressive disorder. *Progress in Neuro-Psychopharmacology and Biological Psychiatry*, 64, 52–59. <https://doi.org/10.1016/j.pnpbp.2015.07.006>
- Yang, Z., Oathes, D., Linn, K. A., Bruce, S. E., Satterthwaite, T. D., Cook, P. A., ... Sheline, Y. I. (2018). Cognitive Behavioral Therapy is Associated with Enhanced Cognitive Control Network Activity in Major Depression and Post-Traumatic Stress Disorder. *Biological Psychiatry: Cognitive Neuroscience and Neuroimaging*. <https://doi.org/10.1016/j.bpsc.2017.12.006>
- Yokoyama, S., Okamoto, Y., Takagaki, K., Okada, G., Takamura, M., Mori, A., ... Yamawaki, S. (2017). Effects of behavioral activation on default mode network connectivity in subthreshold depression: A preliminary resting-state fMRI study. *Journal of Affective Disorders*, 227(September 2017), 156–163. <https://doi.org/10.1016/j.jad.2017.10.021>
- Yoshimura, S., Okamoto, Y., Matsunaga, M., Onoda, K., Okada, G., Kunisato, Y., ... Yamawaki, S. (2017). Cognitive behavioral therapy changes functional connectivity between medial prefrontal and anterior cingulate cortices. *Journal of Affective Disorders*, 208(October 2016), 610–614. <https://doi.org/10.1016/j.jad.2016.10.017>
